# Supplementary material for: Modelling fluorescence lifetimes with TD-DFT: a case study with syn-bimanes
Source: Royal Society of Chemistry journal article supplement (doi:10.1039/c6ra11495d), 2016-01-01
Supplement: c6ra11495d1.pdf [file c6ra11495d1.pdf]

## Supporting Information

### Basis set effect on vertical excitation energies

The effect of the basis set on the predicted vertical excitation energies is examined here. We consider the 6-31+G(d), 6-311+G(d), and aug-cc-pVTZ basis sets with TD-DFT, and only the smaller 6-31+G(d) and 6-311+G(d) basis sets for the correlated wavefunction methods. The smallest *syn*-(H, H) and *anti*-(H, H) bimananes, which make up the core of the different bimane derivatives, are used in this part of the study. The vertical excitation energies of the first allowed excitation of the *syn*-(H, H) and *anti*-(H, H) bimananes are given in Table S1. The lowest allowed transition in the bimananes can be classified as a  $\pi \rightarrow \pi^*$  transition. We only consider the smaller 6-31+G(d) and 6-311+G(d) basis sets for the more expensive correlated wavefunction methods. The cheaper computational cost of TD-DFT allows the inclusion of the large aug-cc-pVTZ basis set here.

Table S1. Vertical excitation energies (eV) of *syn*-(H, H) (**1**) and *anti*-(H, H) (**2**) bimane calculated with various correlated wavefunction methods and TD-DFT. The oscillator strengths for the electronic transitions are given in parentheses.

|          |             | EOM-CCSD         |                         |                  |                  |                  |                  |                  |                  |
|----------|-------------|------------------|-------------------------|------------------|------------------|------------------|------------------|------------------|------------------|
|          |             | SAC-CI           | [CR-EOM-CCSD(T)]        | B3LYP            | PBE0             | M06              | BMK              | CAM-B3LYP        | M06-2X           |
| <b>1</b> | 6-31+G(d)   | 4.03<br>(0.3048) | 4.07 (0.3180)<br>[3.79] | 3.81<br>(0.1986) | 3.89<br>(0.2129) | 3.92<br>(0.1980) | 4.06<br>(0.2336) | 4.11<br>(0.2320) | 4.06<br>(0.2387) |
|          | 6-311+G(d)  | 4.12<br>(0.3048) | 4.06 (0.3118)<br>[3.76] | 3.85<br>(0.1954) | 3.92<br>(0.2101) | 3.96<br>(0.1966) | 4.06<br>(0.2279) | 4.16<br>(0.2266) | 4.06<br>(0.2318) |
|          | aug-cc-pVTZ | -                | -                       | 3.75<br>(0.1883) | 3.82<br>(0.1993) | 3.82<br>(0.1941) | 4.02<br>(0.2122) | 4.06<br>(0.2164) | 4.02<br>(0.2140) |
| <b>2</b> | 6-31+G(d)   | 4.19<br>(0.4306) | 4.14 (0.4428)<br>[3.91] | 3.99<br>(0.2660) | 4.07<br>(0.2833) | 4.08<br>(0.2719) | 4.24<br>(0.3290) | 4.22<br>(0.3449) | 4.21<br>(0.3382) |
|          | 6-311+G(d)  | 4.16<br>(0.4234) | 4.13 (0.4327)<br>[3.85] | 3.97<br>(0.2609) | 4.06<br>(0.2781) | 4.06<br>(0.2678) | 4.23<br>(0.3257) | 4.22<br>(0.3380) | 4.21<br>(0.3338) |
|          | aug-cc-pVTZ | -                | -                       | 3.93<br>(0.2444) | 4.01<br>(0.2586) | 4.00<br>(0.2545) | 4.19<br>(0.3090) | 4.16<br>(0.3138) | 4.17<br>(0.3129) |

For the wavefunction methods, the difference between the values predicted with the 6-31+G(d) to 6-311+G(d) basis sets is minimal, and are within 0.10 eV of each other. The TD-DFT results show a similar trend, even for the largest aug-cc-pVTZ basis set. As such, it is clear that the effect of changing the basis set on the  $\pi \rightarrow \pi^*$  electronic excitation is not significant. This is also supported by previous studies<sup>1, 2</sup>, which suggests that for valence excited states, a double- $\zeta$  basis set with polarisation functions is already sufficient for the study of various classes of chromophores. Hence, we will use the 6-311+G(d) basis set for a compromise between computational cost and accuracy.

### Vertical excitation energies of *syn*-bimanes

Table S2. The lowest three singlet excited states of the *syn*-bimane derivatives calculated with various correlated wavefunction methods and TD-DFT using different frequency-independent exchange-correlation kernels. The most expensive CR-EOM-CCSD(T) method was only carried out on **1**. All vertical excitation energies are in eV. Oscillator strengths for the electronic transitions are given in parentheses. The 6-311+G(d) basis set was used for all calculations.

|                | SAC-CI           | EOM-CCSD                |          | B3LYP            | PBE0             | M06              | BMK              | CAM-B3LYP        | M06-2X           |
|----------------|------------------|-------------------------|----------|------------------|------------------|------------------|------------------|------------------|------------------|
|                |                  | [CR-EOM-CCSD(T)]        |          |                  |                  |                  |                  |                  |                  |
| <b>1</b>       |                  |                         |          |                  |                  |                  |                  |                  |                  |
| S <sub>1</sub> | 4.12<br>(0.3048) | 4.06 (0.3118)<br>[3.79] |          | 3.77<br>(0.0000) | 3.87<br>(0.0000) | 3.94<br>(0.0000) | 4.06<br>(0.2279) | 4.16<br>(0.2266) | 4.06<br>(0.2318) |
| S <sub>2</sub> | 4.83<br>(0.0006) | 4.46 (0.0000)<br>[4.30] |          | 3.85<br>(0.1954) | 3.92<br>(0.2101) | 3.96<br>(0.1966) | 4.14<br>(0.0000) | 4.30<br>(0.0000) | 4.18<br>(0.0001) |
| S <sub>3</sub> | 5.42<br>(0.0016) | 5.09 (0.0000)<br>[4.95] |          | 4.41<br>(0.0027) | 4.53<br>(0.0018) | 4.60<br>(0.0024) | 4.80<br>(0.0013) | 4.92<br>(0.0001) | 4.81<br>(0.0005) |
| <b>2</b>       |                  |                         |          |                  |                  |                  |                  |                  |                  |
| S <sub>1</sub> | 3.79<br>(0.2691) | 4.05                    | (0.3199) | 3.71<br>(0.1974) | 3.78<br>(0.2134) | 3.81<br>(0.2037) | 3.95<br>(0.2348) | 4.07<br>(0.2357) | 3.97<br>(0.2432) |
| S <sub>2</sub> | 4.74<br>(0.0005) | 4.54                    | (0.0000) | 3.91<br>(0.0001) | 4.01<br>(0.0001) | 4.06<br>(0.0001) | 4.25<br>(0.0001) | 4.40<br>(0.0001) | 4.27<br>(0.0001) |
| S <sub>3</sub> | 5.23<br>(0.0087) | 5.13                    | (0.0005) | 4.54<br>(0.0075) | 4.66<br>(0.0062) | 4.53<br>(0.0006) | 4.88<br>(0.0041) | 5.00<br>(0.0031) | 4.87<br>(0.0018) |
| <b>3</b>       |                  |                         |          |                  |                  |                  |                  |                  |                  |
| S <sub>1</sub> | 3.58<br>(0.5468) | 4.41                    | (0.0001) | 3.64<br>(0.6023) | 3.17<br>(0.4024) | 3.27<br>(0.4283) | 3.23<br>(0.4226) | 3.44<br>(0.4843) | 3.49<br>(0.4946) |
| S <sub>2</sub> | 4.66<br>(0.0002) | 5.08                    | (0.0004) | 3.63<br>(0.0000) | 3.75<br>(0.0000) | 3.74<br>(0.0000) | 4.05<br>(0.0000) | 4.16<br>(0.0000) | 4.12<br>(0.0000) |
| S <sub>3</sub> | 5.49<br>(0.0027) |                         |          | 4.45<br>(0.0211) | 4.39<br>(0.0033) | 4.37<br>(0.0025) | 4.71<br>(0.0023) | 4.80<br>(0.0021) | 4.76<br>(0.0012) |

|   |                |                  |      |          |                  |                  |                  |                  |                  |                  |
|---|----------------|------------------|------|----------|------------------|------------------|------------------|------------------|------------------|------------------|
| 4 | S <sub>1</sub> | 3.93<br>(0.2646) | 4.12 | (0.2903) | 3.81<br>(0.0000) | 3.91<br>(0.0000) | 3.99<br>(0.0001) | 4.12<br>(0.2053) | 4.22<br>(0.2085) | 4.12<br>(0.2110) |
|   | S <sub>2</sub> | 4.71<br>(0.0001) | 4.49 | (0.0000) | 3.89<br>(0.1750) | 3.97<br>(0.1881) | 4.03<br>(0.1780) | 4.18<br>(0.0001) | 4.34<br>(0.0001) | 4.22<br>(0.0001) |
|   | S <sub>3</sub> | 5.29<br>(0.0042) | 5.13 | (0.0007) | 4.46<br>(0.0045) | 4.59<br>(0.0032) | 4.66<br>(0.0048) | 4.85<br>(0.0029) | 4.98<br>(0.0028) | 4.86<br>(0.0015) |
| 5 | S <sub>1</sub> | 3.99<br>(0.2017) | 4.25 | (0.2160) | 3.81<br>(0.1103) | 3.90<br>(0.1169) | 3.88<br>(0.1135) | 4.10<br>(0.1385) | 4.12<br>(0.1454) | 4.14<br>(0.1472) |
|   | S <sub>2</sub> | 4.82<br>(0.0001) | 4.64 | (0.0001) | 4.00<br>(0.0002) | 4.12<br>(0.0002) | 4.12<br>(0.0002) | 4.34<br>(0.0002) | 4.43<br>(0.0002) | 4.35<br>(0.0002) |
|   | S <sub>3</sub> | 5.41<br>(0.0235) | 5.17 | (0.0023) | 4.62<br>(0.0155) | 4.73<br>(0.0151) | 4.73<br>(0.0141) | 4.93<br>(0.0089) | 4.99<br>(0.0090) | 4.90<br>(0.0046) |
| 6 | S <sub>1</sub> | 3.73<br>(0.2740) | 4.04 | (0.3196) | 3.60<br>(0.1761) | 3.70<br>(0.1875) | 3.65<br>(0.1844) | 3.89<br>(0.2200) | 3.94<br>(0.2306) | 3.94<br>(0.2326) |
|   | S <sub>2</sub> | 4.81<br>(0.0004) | 4.60 | (0.0001) | 3.94<br>(0.0002) | 4.05<br>(0.0002) | 4.05<br>(0.0002) | 4.31<br>(0.0002) | 4.40<br>(0.0002) | 4.33<br>(0.0002) |
|   | S <sub>3</sub> | 5.34<br>(0.0121) | 5.18 | (0.0036) | 4.56<br>(0.0158) | 4.68<br>(0.0156) | 4.68<br>(0.0015) | 4.93<br>(0.0105) | 4.99<br>(0.0106) | 4.91<br>(0.0056) |
| 7 | S <sub>1</sub> | 3.78<br>(0.2464) | 4.11 | (0.2947) | 3.75<br>(0.1705) | 3.83<br>(0.1850) | 3.87<br>(0.1782) | 4.01<br>(0.2064) | 4.12<br>(0.2114) | 4.03<br>(0.2168) |
|   | S <sub>2</sub> | 4.72<br>(0.0001) | 4.57 | (0.0001) | 3.93<br>(0.0001) | 4.04<br>(0.0001) | 4.11<br>(0.0002) | 4.28<br>(0.0001) | 4.44<br>(0.0002) | 4.30<br>(0.0001) |
|   | S <sub>3</sub> | 5.01<br>(0.0091) | 5.16 | (0.0030) | 4.57<br>(0.0124) | 4.70<br>(0.0106) | 4.43<br>(0.0015) | 4.92<br>(0.0084) | 5.04<br>(0.0076) | 4.90<br>(0.0047) |
| 8 | S <sub>1</sub> | 3.58<br>(0.4898) | 3.72 | (0.5535) | 3.25<br>(0.3533) | 3.35<br>(0.3768) | 3.33<br>(0.3726) | 3.54<br>(0.4299) | 3.60<br>(0.4436) | 3.59<br>(0.4506) |
|   | S <sub>2</sub> | 4.75<br>(0.0001) | 4.47 | (0.0000) | 3.70<br>(0.0000) | 3.82<br>(0.0000) | 3.82<br>(0.0000) | 4.13<br>(0.0000) | 4.24<br>(0.0001) | 4.19<br>(0.0000) |
|   | S <sub>3</sub> | 5.34<br>(0.0011) | 5.13 | (0.0022) | 4.33<br>(0.0068) | 4.47<br>(0.0070) | 4.47<br>(0.0002) | 4.80<br>(0.0051) | 4.88<br>(0.0059) | 4.83<br>(0.0026) |

### Natural transition orbitals (NTOs) for the singlet excitation of the *syn*-bimanes

S<sub>1</sub>  $\pi \rightarrow \pi^*$

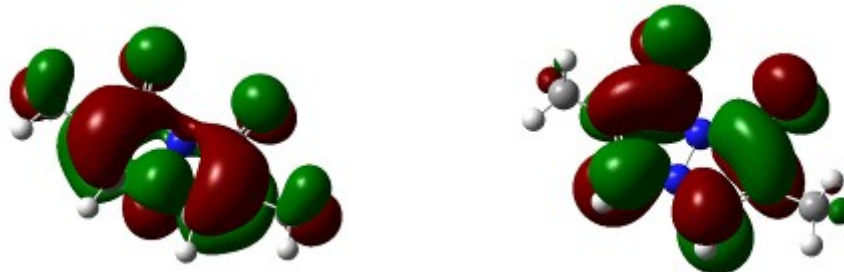

S<sub>2</sub> n→π\*

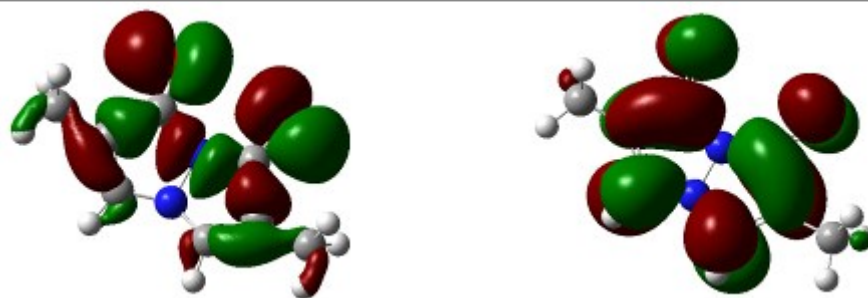

S<sub>3</sub> n→π\*

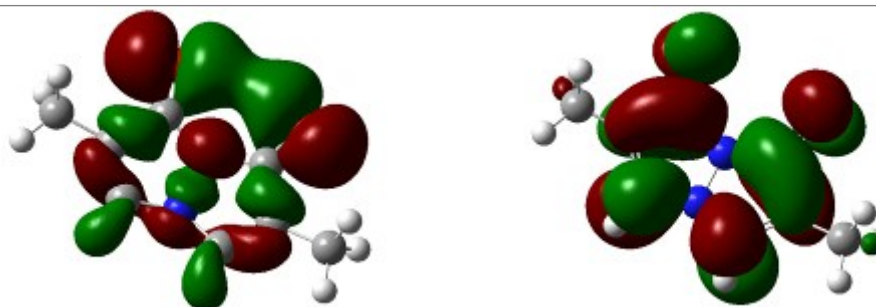

Figure S1. NTOs for the first three TD-B3LYP singlet excitations of **2**.

S<sub>1</sub> π→π\*

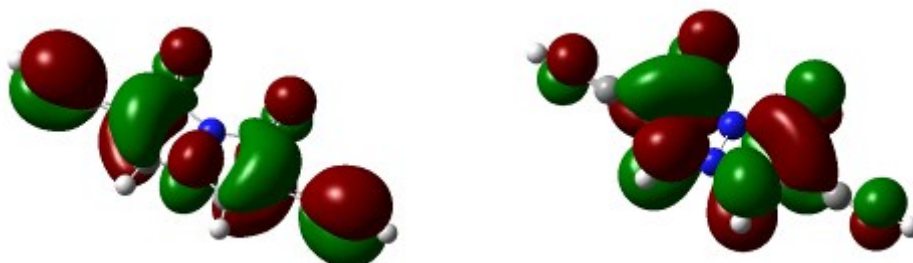

S<sub>2</sub> n→π\*

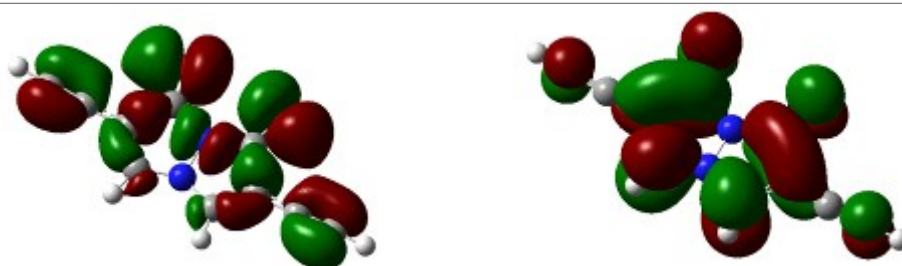

S<sub>3</sub> n→π\*

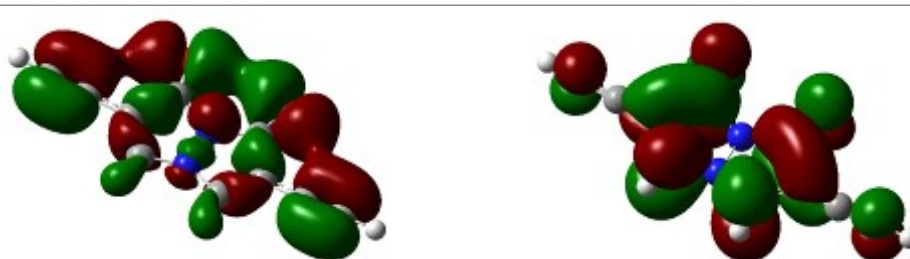

Figure S2. NTOs for the first three TD-B3LYP singlet excitations of **3**.

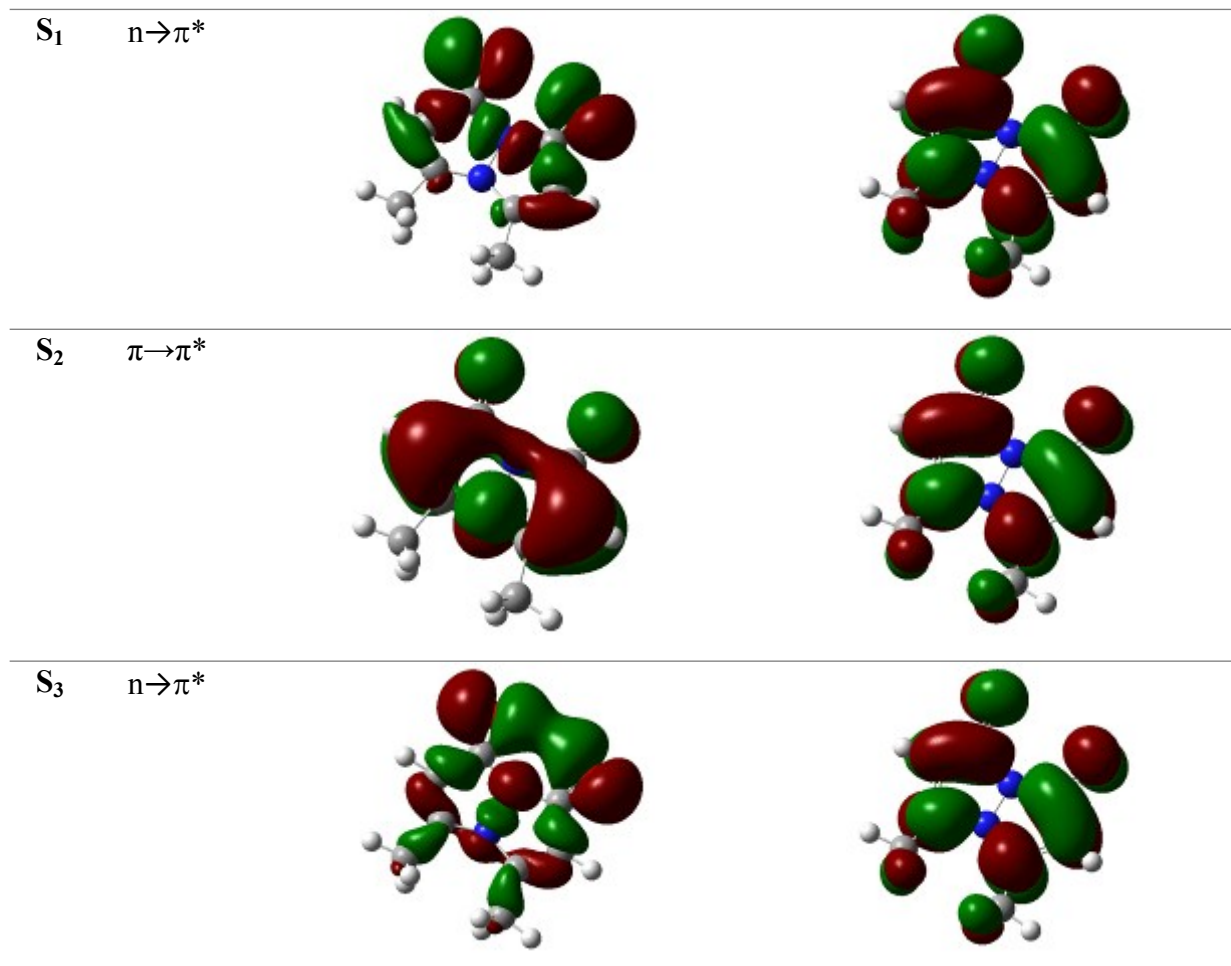

Figure S3. NTOs for the first three TD-B3LYP singlet excitations of **4**.

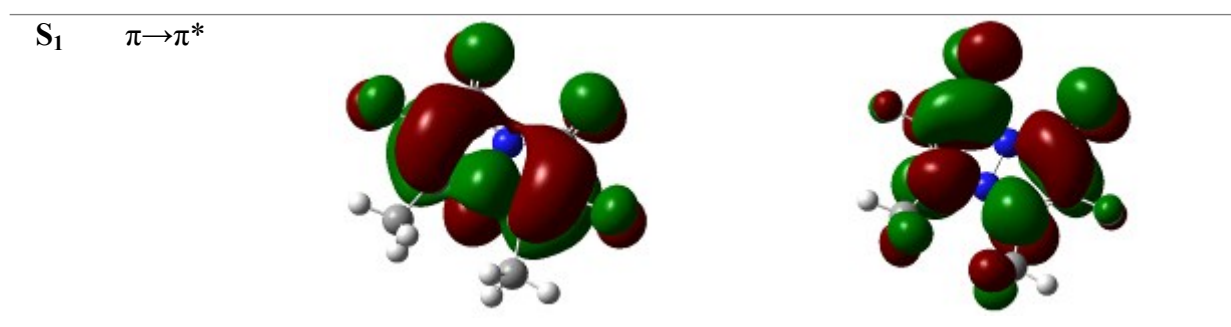

---

$S_2$   $n \rightarrow \pi^*$

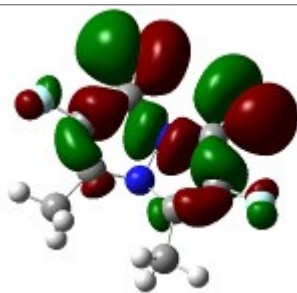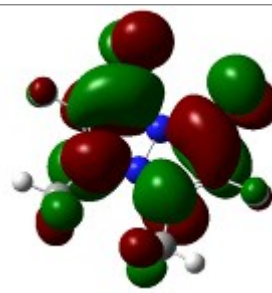

---

$S_3$   $n \rightarrow \pi^*$

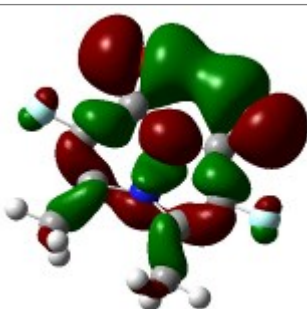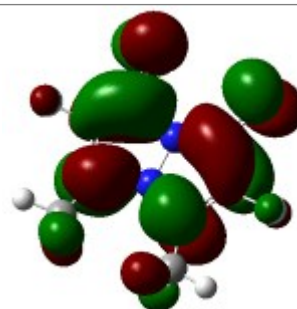

---

Figure S4. NTOs for the first three TD-B3LYP singlet excitations of **5**.

---

$S_1$   $\pi \rightarrow \pi^*$

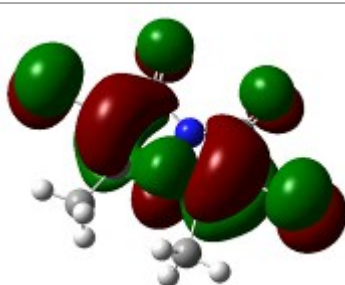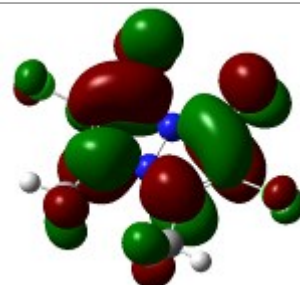

---

$S_2$   $n \rightarrow \pi^*$

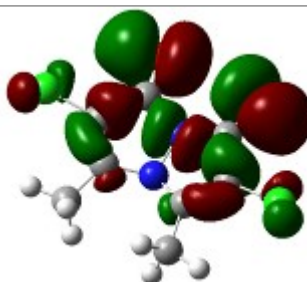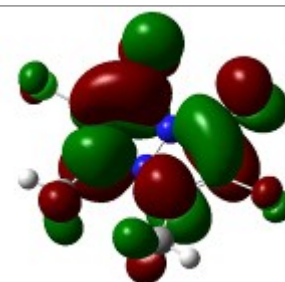

---

$S_3$   $n \rightarrow \pi^*$

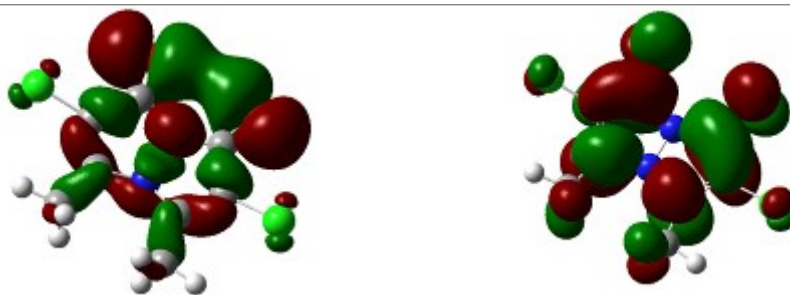

---

Figure S5. NTOs for the first three TD-B3LYP singlet excitations of 6.

---

$S_1$   $\pi \rightarrow \pi^*$

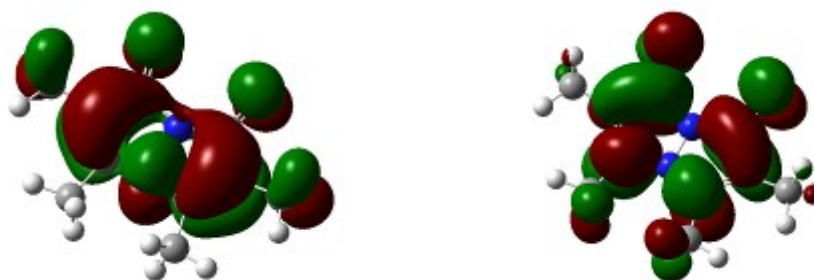

---

$S_2$   $n \rightarrow \pi^*$

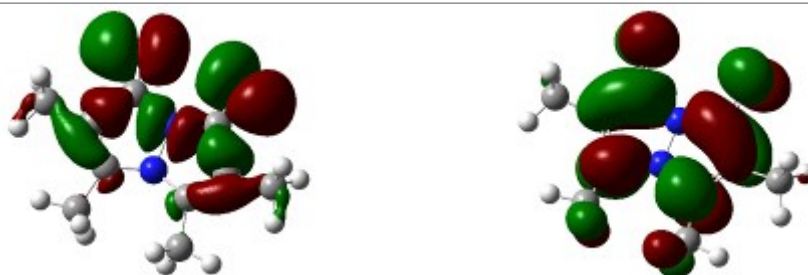

---

$S_3$   $n \rightarrow \pi^*$

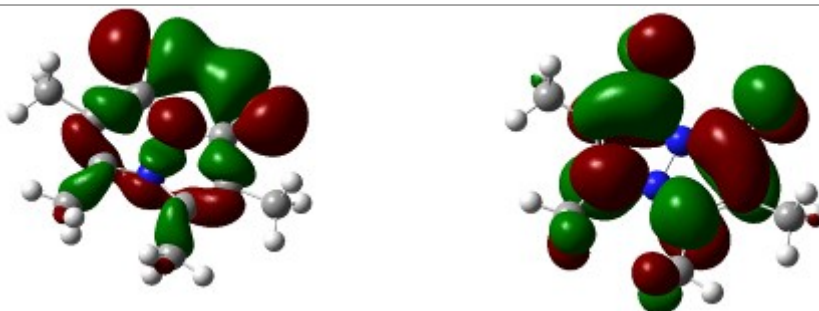

---

Figure S6. NTOs for the first three TD-B3LYP singlet excitations of 7.

S<sub>1</sub>  $\pi \rightarrow \pi^*$

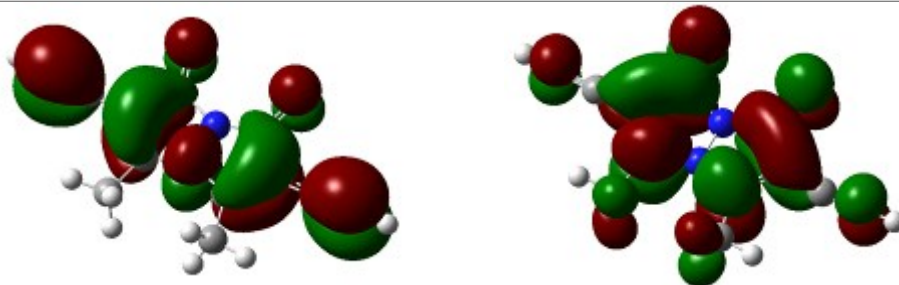

S<sub>2</sub>  $n \rightarrow \pi^*$

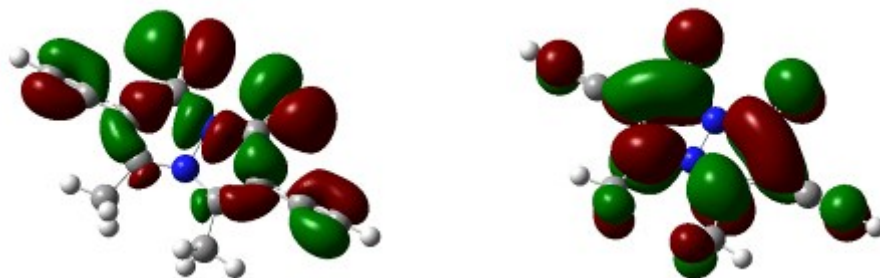

S<sub>3</sub>  $n \rightarrow \pi^*$

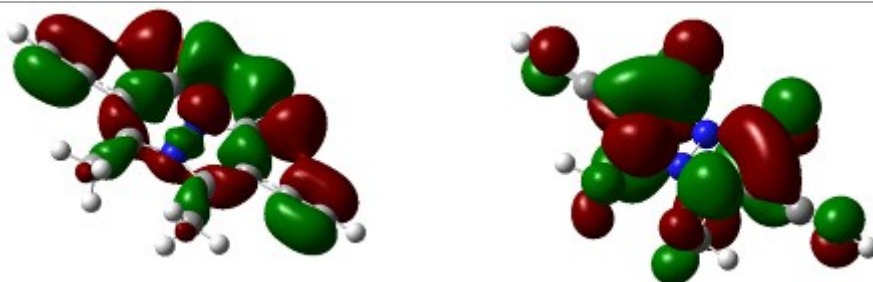

Figure S7. NTOs for the first three TD-B3LYP singlet excitations of **8**.

### Solvation calculation results

Table S3. Experimental absorption and emission wavelengths for the *syn*-bimanes. All values are in eV.

| Molecule | Solvent      | $\lambda_{abs}$ | $\lambda_{emi}$ | Ref.         |
|----------|--------------|-----------------|-----------------|--------------|
| <b>1</b> | 1,4-dioxane  | 3.41            | 3.17            | <sup>3</sup> |
|          | Acetonitrile | 3.37            | 3.12            | <sup>4</sup> |
| <b>2</b> | Acetonitrile | 3.32            | 2.84            | <sup>4</sup> |
| <b>3</b> | Acetonitrile | 3.02            | 2.70            | <sup>5</sup> |



|          |              |      |      |              |
|----------|--------------|------|------|--------------|
| <b>4</b> | 1,4-dioxane  | 3.50 | 3.20 | <sup>3</sup> |
| <b>5</b> | 1,4-dioxane  | 3.65 | 2.87 | <sup>3</sup> |
| <b>6</b> | 1,4-dioxane  | 3.37 | 2.89 | <sup>3</sup> |
| <b>7</b> | 1,4-dioxane  | 3.46 | 2.95 | <sup>3</sup> |
|          | Acetonitrile | 3.37 | 2.85 | <sup>6</sup> |
|          | Ethanol      | 3.36 | 2.82 | <sup>7</sup> |
|          | Water        | 3.18 | 2.57 | <sup>8</sup> |
| <b>8</b> | Acetonitrile | 3.10 | 2.79 | <sup>9</sup> |

Table S4. Computational results for the *syn*-bimanes in solvent.  $\Delta E^{vert}$  refers to the comparison done using the vertical transition energies, while  $\lambda$  refers to the comparison between the band maxima obtained from the vibrationally resolved absorption and emission spectra and the respective experimental values. All values are in eV.

| Solvent  |              |           | PCM                     |                 |                         |                 | SMD                     |                 |                         |                 |
|----------|--------------|-----------|-------------------------|-----------------|-------------------------|-----------------|-------------------------|-----------------|-------------------------|-----------------|
|          |              |           | $\Delta E_{abs}^{vert}$ | $\lambda_{abs}$ | $\Delta E_{emi}^{vert}$ | $\lambda_{emi}$ | $\Delta E_{abs}^{vert}$ | $\lambda_{abs}$ | $\Delta E_{emi}^{vert}$ | $\lambda_{emi}$ |
| <b>1</b> | 1,4-dioxane  | B3LYP     | 3.72                    | 3.58            | 3.37                    | 3.22            | 3.71                    | 3.57            | 3.37                    | 3.22            |
|          |              | PBE0      | 3.79                    | 3.66            | 3.48                    | 3.34            | 3.78                    | 3.65            | 3.48                    | 3.34            |
|          |              | M06       | 3.85                    | 3.71            | 3.46                    | 3.31            | 3.83                    | 3.70            | 3.46                    | 3.32            |
|          |              | BMK       | 3.97                    | 3.86            | 3.56                    | 3.43            | 3.96                    | 3.85            | 3.57                    | 3.44            |
|          |              | CAM-B3LYP | 4.03                    | 3.92            | 3.63                    | 3.50            | 4.02                    | 3.90            | 3.63                    | 3.51            |
|          |              | M06-2X    | 4.08                    | 3.96            | 3.62                    | 3.48            | 4.05                    | 3.93            | 3.62                    | 3.49            |
| <b>1</b> | Acetonitrile | B3LYP     | 3.51                    | 3.41            | 3.05                    | 2.94            | 3.53                    | 3.43            | 3.05                    | 2.94            |
|          |              | PBE0      | 3.58                    | 3.49            | 3.18                    | 3.07            | 3.60                    | 3.51            | 3.18                    | 3.08            |
|          |              | M06       | 3.67                    | 3.57            | 3.18                    | 3.07            | 3.68                    | 3.58            | 3.18                    | 3.07            |
|          |              | BMK       | 3.75                    | 3.66            | 3.24                    | 3.14            | 3.77                    | 3.68            | 3.24                    | 3.15            |
|          |              | CAM-B3LYP | 3.82                    | 3.73            | 3.33                    | 3.23            | 3.83                    | 3.74            | 3.33                    | 3.23            |
|          |              | M06-2X    | 3.88                    | 3.78            | 3.33                    | 3.22            | 3.87                    | 3.78            | 3.33                    | 3.23            |
| <b>2</b> | Acetonitrile | B3LYP     | 3.33                    | 3.21            | 2.63                    | 2.49            | 3.33                    | 3.20            | 2.63                    | 2.49            |
|          |              | PBE0      | 3.40                    | 3.29            | 2.73                    | 2.61            | 3.40                    | 3.31            | 2.74                    | 2.64            |
|          |              | M06       | 3.46                    | 3.34            | 2.74                    | 2.60            | 3.46                    | 3.34            | 2.74                    | 2.61            |
|          |              | BMK       | 3.61                    | 3.50            | 2.82                    | 2.71            | 3.61                    | 3.50            | 2.83                    | 2.72            |
|          |              | CAM-B3LYP | 3.68                    | 3.57            | 2.92                    | 2.80            | 3.68                    | 3.57            | 2.92                    | 2.79            |

|          |              |           |      |      |      |      |      |      |      |      |
|----------|--------------|-----------|------|------|------|------|------|------|------|------|
|          |              | M06-2X    | 3.75 | 3.63 | 2.92 | 2.79 | 3.75 | 3.63 | 2.92 | 2.80 |
| <b>3</b> | Acetonitrile | B3LYP     | 2.94 | 2.84 | 2.41 | 2.31 | 3.04 | 2.94 | 2.51 | 2.41 |
|          |              | PBE0      | 3.07 | 2.98 | 2.56 | 2.46 | 3.17 | 3.08 | 2.66 | 2.57 |
|          |              | M06       | 3.11 | 3.01 | 2.60 | 2.49 | 3.21 | 3.11 | 2.70 | 2.60 |
|          |              | BMK       | 3.27 | 3.19 | 2.75 | 2.66 | 3.36 | 3.28 | 2.85 | 2.76 |
|          |              | CAM-B3LYP | 3.39 | 3.30 | 2.90 | 2.80 | 3.47 | 3.38 | 2.99 | 2.90 |
|          |              | M06-2X    | 3.41 | 3.32 | 2.90 | 2.80 | 3.48 | 3.39 | 2.99 | 2.89 |
| <b>4</b> | 1,4-dioxane  | B3LYP     | 3.76 | 3.61 | 3.37 | 3.21 | 3.76 | 3.62 | 3.37 | 3.22 |
|          |              | PBE0      | 3.84 | 3.70 | 3.48 | 3.34 | 3.85 | 3.71 | 3.49 | 3.34 |
|          |              | M06       | 3.93 | 3.79 | 3.48 | 3.33 | 3.91 | 3.77 | 3.49 | 3.34 |
|          |              | BMK       | 4.03 | 3.91 | 3.58 | 3.44 | 4.03 | 3.91 | 3.59 | 3.46 |
|          |              | CAM-B3LYP | 4.09 | 3.97 | 3.66 | 3.53 | 4.08 | 3.96 | 3.67 | 3.54 |
|          |              | M06-2X    | 4.15 | 4.03 | 3.65 | 3.51 | 4.11 | 3.99 | 3.66 | 3.52 |
| <b>5</b> | 1,4-dioxane  | B3LYP     | 3.66 | 3.52 | 2.86 | 2.71 | 3.67 | 3.53 | 2.87 | 2.73 |
|          |              | PBE0      | 3.75 | 3.62 | 2.94 | 2.80 | 3.75 | 3.62 | 2.96 | 2.83 |
|          |              | M06       | 3.81 | 3.68 | 2.97 | 2.83 | 3.82 | 3.69 | 2.99 | 2.85 |
|          |              | BMK       | 3.99 | 3.88 | 3.06 | 2.93 | 3.99 | 3.87 | 3.08 | 2.96 |
|          |              | CAM-B3LYP | 4.03 | 3.91 | 3.17 | 3.04 | 4.04 | 3.92 | 3.19 | 3.06 |
|          |              | M06-2X    | 4.15 | 4.02 | 3.16 | 3.03 | 4.14 | 4.02 | 3.18 | 3.05 |
| <b>6</b> | 1,4-dioxane  | B3LYP     | 3.45 | 3.34 | 2.84 | 2.72 | 3.46 | 3.35 | 2.89 | 2.77 |
|          |              | PBE0      | 3.53 | 3.43 | 2.93 | 2.82 | 3.54 | 3.43 | 2.99 | 2.87 |
|          |              | M06       | 3.58 | 3.48 | 2.92 | 2.81 | 3.58 | 3.47 | 2.98 | 2.86 |
|          |              | BMK       | 3.80 | 3.70 | 3.11 | 3.00 | 3.79 | 3.70 | 3.16 | 3.07 |
|          |              | CAM-B3LYP | 3.86 | 3.77 | 3.20 | 3.10 | 3.86 | 3.76 | 3.25 | 3.14 |
|          |              | M06-2X    | 3.95 | 3.84 | 3.18 | 3.06 | 3.94 | 3.84 | 3.22 | 3.11 |
| <b>7</b> | 1,4-dioxane  | B3LYP     | 3.58 | 3.45 | 2.95 | 2.81 | 3.55 | 3.41 | 2.97 | 2.81 |
|          |              | PBE0      | 3.66 | 3.54 | 3.05 | 2.92 | 3.63 | 3.50 | 3.06 | 2.91 |
|          |              | M06       | 3.73 | 3.58 | 3.04 | 2.89 | 3.69 | 3.55 | 3.05 | 2.90 |
|          |              | BMK       | 3.88 | 3.76 | 3.17 | 3.05 | 3.83 | 3.70 | 3.18 | 3.04 |
|          |              | CAM-B3LYP | 3.95 | 3.84 | 3.25 | 3.13 | 3.91 | 3.79 | 3.27 | 3.14 |
|          |              | M06-2X    | 4.03 | 3.89 | 3.24 | 3.08 | 3.99 | 3.85 | 3.25 | 3.10 |
| <b>7</b> | Acetonitrile | B3LYP     | 3.35 | 3.24 | 2.62 | 2.50 | 3.35 | 3.22 | 2.62 | 2.49 |
|          |              | PBE0      | 3.43 | 3.33 | 2.72 | 2.61 | 3.44 | 3.32 | 2.73 | 2.60 |
|          |              | M06       | 3.51 | 3.39 | 2.74 | 2.61 | 3.51 | 3.38 | 2.77 | 2.63 |
|          |              | BMK       | 3.61 | 3.51 | 2.81 | 2.71 | 3.61 | 3.51 | 2.88 | 2.76 |
|          |              | CAM-B3LYP | 3.70 | 3.61 | 2.91 | 2.81 | 3.69 | 3.58 | 2.92 | 2.80 |

|   |              |           |      |      |      |      |      |      |      |      |
|---|--------------|-----------|------|------|------|------|------|------|------|------|
|   |              | M06-2X    | 3.80 | 3.68 | 2.90 | 2.76 | 3.79 | 3.67 | 2.92 | 2.79 |
| 7 | Ethanol      | B3LYP     | 3.36 | 3.25 | 2.63 | 2.51 | 3.20 | 3.08 | 2.41 | 2.29 |
|   |              | PBE0      | 3.44 | 3.34 | 2.74 | 2.63 | 3.28 | 3.17 | 2.50 | 2.37 |
|   |              | M06       | 3.52 | 3.40 | 2.75 | 2.62 | 3.36 | 3.26 | 2.55 | 2.43 |
|   |              | BMK       | 3.62 | 3.52 | 2.83 | 2.72 | 3.47 | 3.37 | 2.60 | 2.49 |
|   |              | CAM-B3LYP | 3.71 | 3.62 | 2.93 | 2.83 | 3.55 | 3.45 | 2.72 | 2.61 |
|   |              | M06-2X    | 3.81 | 3.69 | 2.92 | 2.79 | 3.65 | 3.54 | 2.68 | 2.56 |
| 7 | Water        | B3LYP     | 3.34 | 3.23 | 2.60 | 2.48 | 3.21 | 3.10 | 2.32 | 2.20 |
|   |              | PBE0      | 3.42 | 3.32 | 2.70 | 2.60 | 3.31 | 3.20 | 2.41 | 2.29 |
|   |              | M06       | 3.50 | 3.38 | 2.73 | 2.60 | 3.39 | 3.29 | 2.44 | 2.32 |
|   |              | BMK       | 3.60 | 3.50 | 2.80 | 2.69 | 3.50 | 3.40 | 2.49 | 2.38 |
|   |              | CAM-B3LYP | 3.69 | 3.60 | 2.89 | 2.80 | 3.58 | 3.49 | 2.60 | 2.50 |
|   |              | M06-2X    | 3.79 | 3.67 | 2.88 | 2.75 | 3.68 | 3.57 | 2.56 | 2.44 |
| 6 | Acetonitrile | B3LYP     | 2.99 | 2.90 | 2.46 | 2.36 | 3.11 | 3.01 | 2.57 | 2.47 |
|   |              | PBE0      | 3.13 | 3.04 | 2.61 | 2.51 | 3.25 | 3.16 | 2.73 | 2.62 |
|   |              | M06       | 3.21 | 3.11 | 2.66 | 2.55 | 3.31 | 3.21 | 2.77 | 2.66 |
|   |              | BMK       | 3.36 | 3.28 | 2.81 | 2.72 | 3.45 | 3.37 | 2.93 | 2.84 |
|   |              | CAM-B3LYP | 3.47 | 3.39 | 2.96 | 2.87 | 3.57 | 3.49 | 3.07 | 2.98 |
|   |              | M06-2X    | 3.50 | 3.41 | 2.95 | 2.85 | 3.60 | 3.51 | 3.05 | 2.96 |

### Statistical results with SMD model

Table S5. Mean signed and unsigned absolute errors (MSE and MUE), and standard deviation (SD) obtained by comparing computational and experimental values.  $\Delta E^{vert}$  refers to the comparison done using the vertical transition energies, while  $\lambda$  refers to the comparison between the band maxima obtained from the vibrationally resolved absorption and emission spectra and the respective experimental values. All values are in eV.

|       | Absorption              |                 |                         |                 |                         |                 |
|-------|-------------------------|-----------------|-------------------------|-----------------|-------------------------|-----------------|
|       | MSE                     |                 | MUE                     |                 | SD                      |                 |
|       | $\Delta E_{abs}^{vert}$ | $\lambda_{abs}$ | $\Delta E_{abs}^{vert}$ | $\lambda_{abs}$ | $\Delta E_{abs}^{vert}$ | $\lambda_{abs}$ |
| B3LYP | 0.067                   | -0.053          | 0.098                   | 0.109           | 0.099                   | 0.065           |
| PBE0  | 0.158                   | 0.047           | 0.171                   | 0.093           | 0.106                   | 0.077           |
| M06   | 0.221                   | 0.104           | 0.221                   | 0.122           | 0.182                   | 0.087           |

| BMK       | 0.355                   | 0.253           | 0.355                   | 0.253           | 0.156                   | 0.112           |
|-----------|-------------------------|-----------------|-------------------------|-----------------|-------------------------|-----------------|
| CAM-B3LYP | 0.431                   | 0.329           | 0.431                   | 0.329           | 0.211                   | 0.106           |
| M06-2X    | 0.495                   | 0.386           | 0.495                   | 0.386           | 0.222                   | 0.088           |
| Emission  |                         |                 |                         |                 |                         |                 |
|           | MSE                     |                 | MUE                     |                 | SD                      |                 |
|           | $\Delta E_{emi}^{vert}$ | $\lambda_{emi}$ | $\Delta E_{emi}^{vert}$ | $\lambda_{emi}$ | $\Delta E_{emi}^{vert}$ | $\lambda_{emi}$ |
| B3LYP     | -0.097                  | -0.227          | 0.164                   | 0.238           | 0.116                   | 0.147           |
| PBE0      | 0.014                   | -0.106          | 0.147                   | 0.159           | 0.098                   | 0.120           |
| M06       | 0.028                   | -0.098          | 0.130                   | 0.146           | 0.121                   | 0.107           |
| BMK       | 0.137                   | 0.026           | 0.189                   | 0.149           | 0.125                   | 0.093           |
| CAM-B3LYP | 0.233                   | 0.119           | 0.249                   | 0.182           | 0.183                   | 0.093           |
| M06-2X    | 0.218                   | 0.100           | 0.243                   | 0.0182          | 0.182                   | 0.086           |

### Calculation of fluorescence lifetimes with TD-DFT

Table S6. Experimental quantum yields ( $\phi_f$ ) and fluorescence lifetimes ( $\tau_f$ ) of the *syn*-bimanes. \*Quantum yield taken to be 1.00 for **7**. All lifetime values are in ns.

| Molecule | Solvent     | $\phi_f$ | $\tau_f$ | Ref.         |
|----------|-------------|----------|----------|--------------|
| <b>1</b> | 1,4-dioxane | 0.92     | 7.4      | <sup>3</sup> |
| <b>4</b> | 1,4-dioxane | 0.97     | 9.8      | <sup>3</sup> |
| <b>5</b> | 1,4-dioxane | 1.00     | 17.0     | <sup>3</sup> |
| <b>6</b> | 1,4-dioxane | 1.02*    | 10.7     | <sup>3</sup> |
| <b>7</b> | 1,4-dioxane | 0.90     | 12.3     | <sup>3</sup> |

Table S7. Computational fluorescence lifetime results for *syn*-bimanes in 1,4-dioxane. All values are in ns.

|          | PCM   |      |     |     |           |        |
|----------|-------|------|-----|-----|-----------|--------|
|          | B3LYP | PBE0 | M06 | BMK | CAM-B3LYP | M06-2X |
| <b>1</b> | 8.8   | 7.2  | 7.9 | 5.7 | 5.7       | 5.1    |

|          |      |      |      |      |      |      |
|----------|------|------|------|------|------|------|
| <b>4</b> | 12.2 | 10.1 | 9.4  | 7.7  | 7.1  | 6.4  |
| <b>5</b> | 26.8 | 22.9 | 22.3 | 18.1 | 15.1 | 13.8 |
| <b>6</b> | 14.4 | 12.4 | 12.0 | 9.9  | 8.0  | 8.1  |
| <b>7</b> | 12.7 | 10.7 | 10.8 | 8.5  | 7.7  | 8.0  |

| <b>SMD</b> |       |      |      |      |           |        |
|------------|-------|------|------|------|-----------|--------|
|            | B3LYP | PBE0 | M06  | BMK  | CAM-B3LYP | M06-2X |
| <b>1</b>   | 8.6   | 7.1  | 7.8  | 5.6  | 5.6       | 5.0    |
| <b>4</b>   | 12.1  | 10.0 | 9.2  | 7.3  | 7.3       | 6.3    |
| <b>5</b>   | 27.1  | 21.7 | 21.9 | 16.9 | 14.4      | 14.2   |
| <b>6</b>   | 13.3  | 11.2 | 11.5 | 8.3  | 7.4       | 7.5    |
| <b>7</b>   | 13.5  | 10.8 | 10.9 | 8.7  | 8.0       | 8.0    |

Table S8. The mean signed (MSE) and percentage error (MPE) for fluorescence lifetimes calculated using the SMD model. The MSE is reported in ns, and the MPE is a percentage.

|           | <b>MSE</b> | <b>MUE</b> | <b>MPE</b> |
|-----------|------------|------------|------------|
| B3LYP     | 3.5        | 3.5        | 26.9       |
| PBE0      | 0.7        | 1.4        | 10.0       |
| M06       | 0.8        | 1.6        | 11.8       |
| BMK       | -2.1       | 2.1        | 20.4       |
| CAM-B3LYP | -2.9       | 2.9        | 25.9       |
| M06-2X    | -3.2       | 3.2        | 30.0       |

#### References

1. A. Charaf-Eddin, A. Planchat, B. Mennucci, C. Adamo and D. Jacquemin, *J. Chem. Theory Comput.*, 2013, **9**, 2749-2760.

2. C. A. Guido, S. Knecht, J. Kongsted and B. Mennucci, *J. Chem. Theory Comput.*, 2013, **9**, 2209-2220.
3. E. M. Kosower, R. Giniger, A. Radkowsky, D. Hebel and A. Shusterman, *J. Phys. Chem.*, 1986, **90**, 5552-5557.
4. E. M. Kosower, D. Faust, M. Ben-Shoshan and I. Goldberg, *J. Org. Chem.*, 1982, **47**, 214-221.
5. E. M. Kosower, M. Ben-Shoshan and I. Goldberg, *Chem. Commun.*, 1993, DOI: 10.1039/c39930001644, 1644.
6. E. M. Kosower and J. R. de Souza, *Chem. Phys.*, 2006, **324**, 3-7.
7. E. M. Kosower and R. Giniger, *J. Phys. Chem.*, 1988, **92**, 1140-1142.
8. L. D. Lavis and R. T. Raines, *ACS Chem. Biol.*, 2008, **3**, 142-155.
9. E. M. Kosower and M. Ben-Shoshan, *J. Org. Chem.*, 1996, **61**, 5871-5884.
